# Supplementary material for: A Novel Demulsifier with Strong Hydrogen Bonding for Effective Breaking of Water-in-Heavy Oil Emulsions
Source: MDPI journal article supplement (doi:10.3390/ijms241914805), 2023-09-30
Supplement: s1 [file s1]

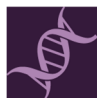

Article

# A Novel Demulsifier with Strong Hydrogen Bonding for Effective Breaking of Water-in-Heavy Oil Emulsions

Xiao Xia <sup>1,2,†</sup>, Jun Ma <sup>1,2,\*</sup>, Fei Liu <sup>1,2</sup>, Haifeng Cong <sup>3,4</sup> and Xingang Li <sup>3,4</sup>

<sup>1</sup> Department of Chemical Engineering, School of Chemistry and Chemical Engineering, Guizhou University, Guiyang 550025, China; xiaxiao2021@163.com (X.X.); ce.feiliu@gzu.edu.cn (F.L.)

<sup>2</sup> Guizhou Key Laboratory for Green Chemical and Clean Energy Technology, Guiyang 550025, China

<sup>3</sup> School of Chemical Engineering and Technology, Tianjin University, Tianjin 300072, China; conghaifeng@tju.edu.cn (H.C.); lxg@tju.edu.cn (X.L.)

<sup>4</sup> Zhejiang Institute of Tianjin University, Ningbo 315201, China

\* Correspondence: jma3@gzu.edu.cn

† These authors contributed equally to this work.

## Supporting information

### 1. Molecular weight analysis of demulsifiers

**Fig. S1** shows the gel permeation chromatography of different demulsifiers, transverse axis is the logarithmic value of molecular weight, vertical axis is the weight-normalized area of the slice ( $dwt/d(\log M)$ ) and cumulative percentage of the area (Ht%). The absolute value of the area of the slice is divided by the slope of the calibration curve at the adjusted elution volume of the slice. The ratios of area to slope for all the slices are summed, and then each ratio is divided by the sum.

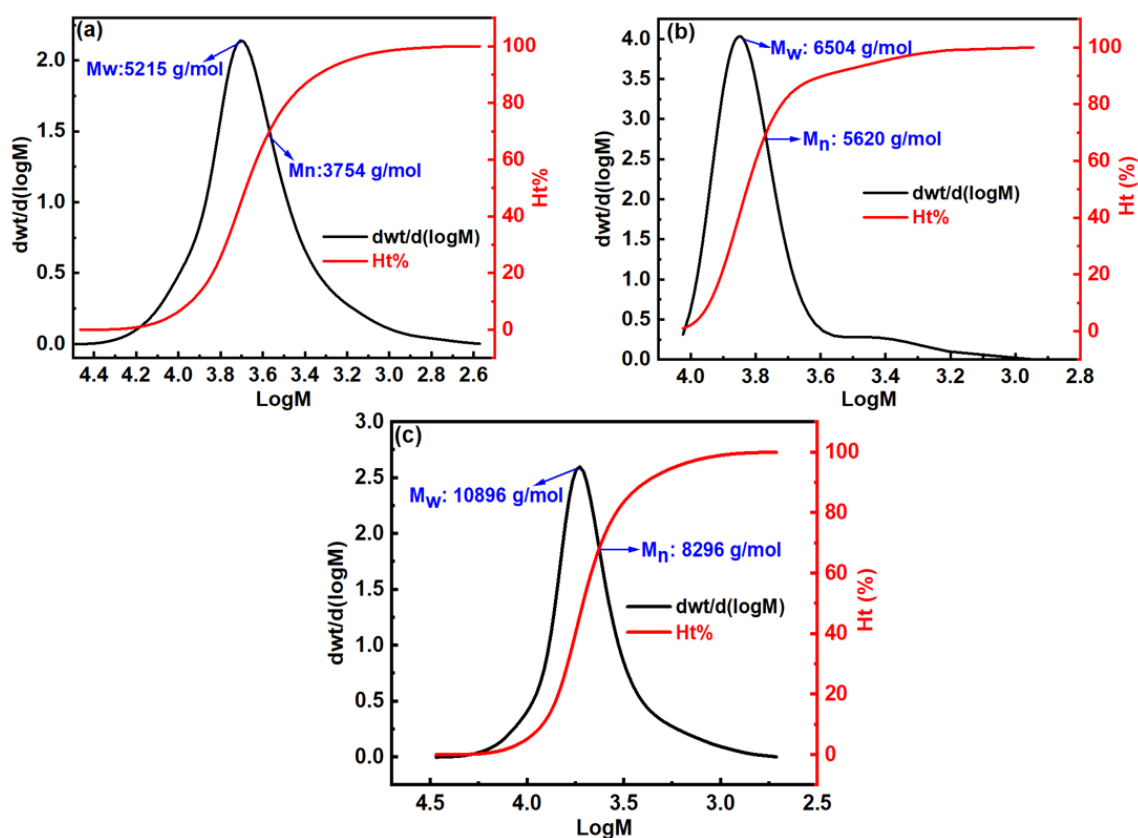

**Figure S1.** Gel permeation chromatogram of different demulsifiers (a: FAP, b: JXGZ, c: h-PAMAM).

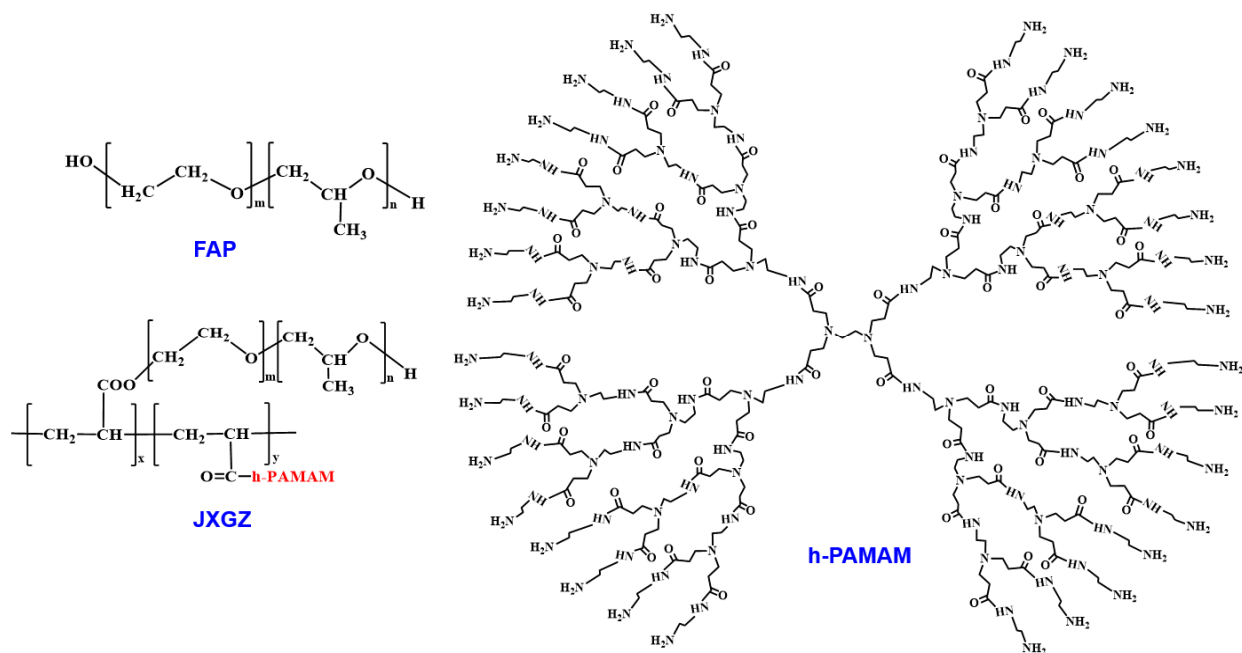

**Figure S2.** The structure diagram of FAP, JXGZ and h-PAMAM demulsifiers.

## 2. Synthetic demulsifier

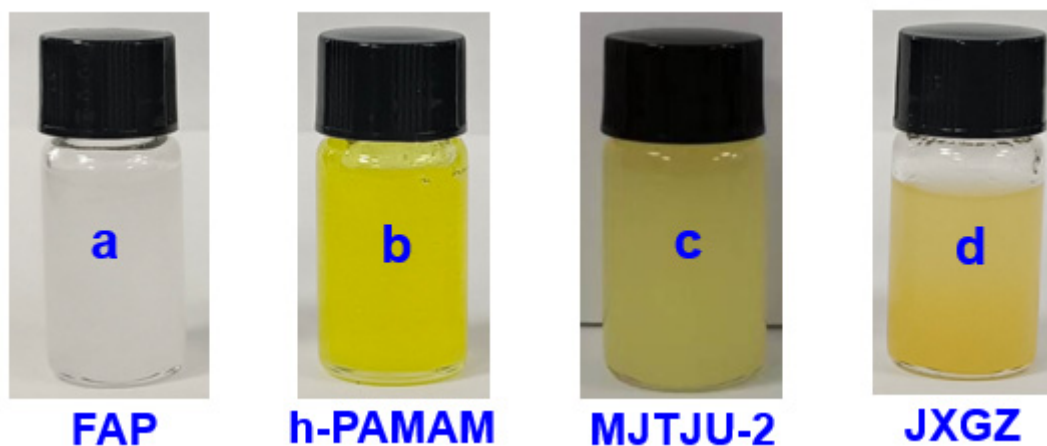

**Figure S3.** The photograph of different demulsifiers.

## 3. Optimization of molecular structure model and molecular dynamics calculations

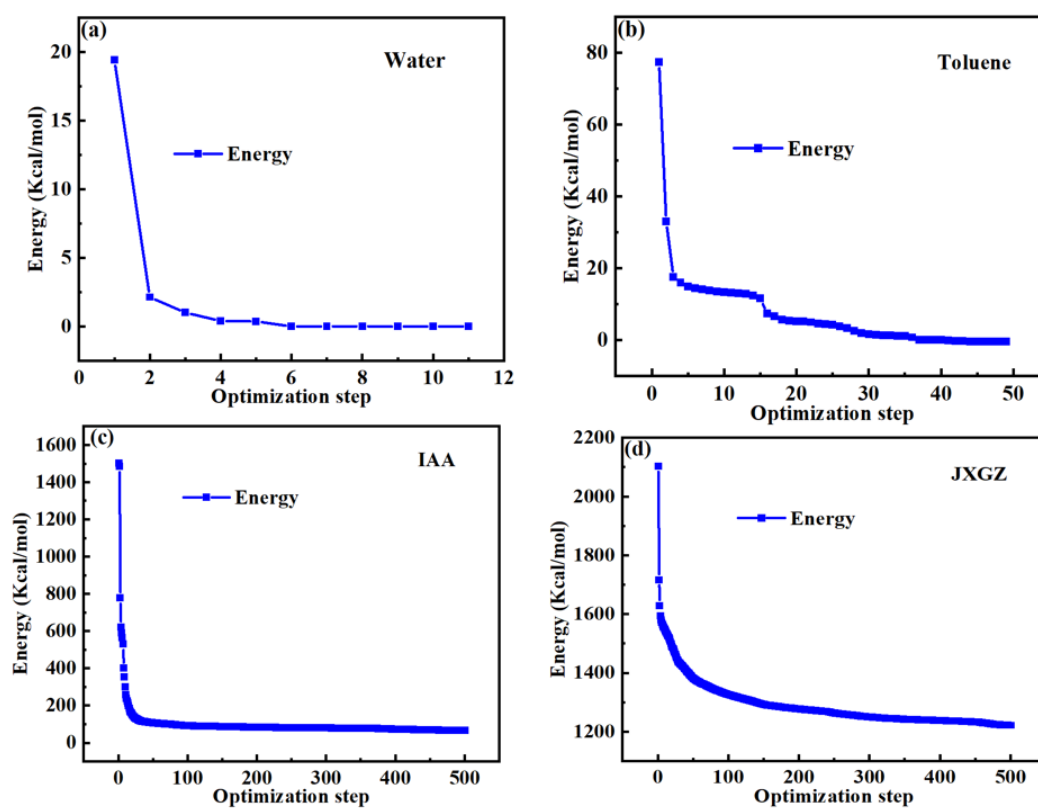

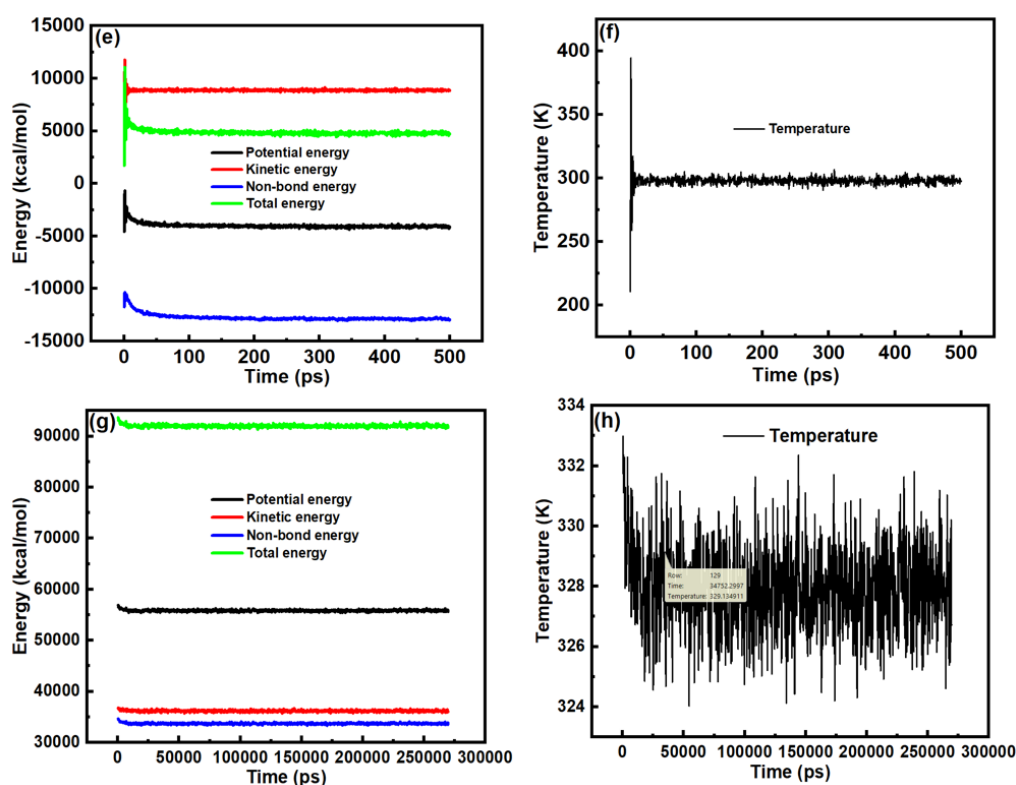

**Figure S4.** The change curve of energy with simulation steps of optimized molecular structures (a-d), and the variable curve of energy and temperature with simulation time in all atom molecular dynamics simulation (e and f) and dissipative particle dynamics simulation (g and h).

## 4. Dissipative particle dynamics (DPD) simulation theories

The DPD theory is described from the following three aspects: the force of DPD simulation, the algorithm of DPD simulation, and the calculation process of DPD simulation.

### 4.1. The Force in DPD Simulation

Hoogerbrugge and Koelman developed DPD simulation in the present form of Espanol[1, 2]. In the DPD simulation, the elementary atoms or molecules are defined as a bead, and the "bead" is used to replace some groups or substances in molecules. The motion behavior of beads conforms to Newton's equation of motion, as shown in formulas (1) and (2) [3].

$$\frac{dr_i}{dt} = v_i \quad (1)$$

$$m_i \frac{dv_i}{dt} = f_i \quad (2)$$

Where  $r_i$ ,  $v_i$ , and  $f_i$  represent the displacement, velocity, and total acting force of the  $i$  th bead, respectively.

In the DPD system, in order to calculate conveniently, the mass of each bead in the system is divided into the same, and the non dimensional unit mass is used to represent the mass of each bead ( $m_i = 1$ ). According to formula (2), the total force of each bead can be obtained is equal to its acceleration in numerical value. The total acting force of each bead can be divided into three parts: the conservative force  $F_{ij}^C$  (the force is only related to the initial and final positions of the beads, indicating the repulsion between the beads), the dissipative force  $F_{ij}^D$  (the force is determined by the relative velocity between beads) and the random force  $F_{ij}^R$  (the force is used to describe the collision between beads). The total acting force of each bead in the system can be described by equation (3) [4].

$$f_i = \sum_{j \neq i} (F_{ij}^C + F_{ij}^D + F_{ij}^R) \quad (3)$$

Where  $i$  and  $j$  of the subscript indicate the interaction between different beads. The physical meaning of the summation symbol is that the forces exerted on other beads are summed without considering the beads  $i$  within the specific truncation radius  $r_c$ . According to the position coordinates of beads in the system, the magnitude and direction of three forces of beads will be obtained. The interaction between beads can be determined by truncation radius  $r_c$  (in DPD simulation system, the truncation radius is dimensionless unit length,  $r_c = 1$ ). If the distance between beads in the system is larger than the truncation radius, there is no interaction between beads.

The conservative force is calculated according to formula (4). Where  $a_{ij}$  is the repulsion force parameter between beads. The maximum repulsion force between beads is shown in equation (5). Groot and Warren [1,

5] compared the free energy of molecular structure model in DPD system with Flory Huggins theory of polymer system [6-9], and obtained the repulsive force parameter between different beads  $a_{ij}$ , similar beads  $a_{ii}$ . They found that the Flory Huggins parameter  $\chi_{ij}$  satisfy the relationship shown in equation (6). The density of the system is set to 3 so that the fluid in the system possess the compressibility similar to water.

$$F_{ij}^C = \begin{cases} a_{ij}(1 - |r_{ij}|)r_{ij}^\wedge & r_{ij} < r_c \\ 0 & r_{ij} \geq r_c \end{cases} \quad (4)$$

$$r_{ij} = r_j - r_i, \quad r_{ij}^\wedge = r_{ij}/|r_{ij}| \quad (5)$$

$$\alpha_{ij} = \alpha_{ii} + \frac{\chi_{ij}(T)}{0.306} = \alpha_{ii} + 3.27\chi_{ij}(T) \quad \rho = 3 \quad (6)$$

The dissipative force is described by equation (7). The dissipation force is proportional to the relative velocity between the two beads. Its role is to reduce the relative vector between the beads, where  $\omega^D(r_{ij})$  is a short-range weight function. The dissipative force can maintain the momentum conservation between the beads, ensuring the momentum of the whole system is conserved.

$$F_{ij}^D = \begin{cases} -\gamma\omega^D(r_{ij})(r_{ij}^\wedge \cdot v_{ij})r_{ij}^\wedge & r_{ij} < r_c \\ 0 & r_{ij} \geq r_c \end{cases} \quad (7)$$

The random force is described by equation (8), where  $\theta_{ij}(t)$  is a random variable of compound Gaussian distribution and possesses the following relationship:  $\langle \theta_{ij}(t) \rangle = 0$  and  $\langle \theta_{ij}(t)\theta_{kl}(t') \rangle = (\delta_{ik}\delta_{jl} + \delta_{il}\delta_{jk})\delta(t - t')$ . In the simulation system, the random force is not added to each moving bead separately, but as pairs of beads. Therefore, the total linear momentum can be conserved.

$$F_{ij}^R = \begin{cases} \sigma\omega^R(r_{ij})\theta_{ij}r_{ij}^\wedge & r_{ij} < r_c \\ 0 & r_{ij} \geq r_c \end{cases} \quad (8)$$

## 4.2. The Algorithm of DPD Simulation

In DPD simulation, the improved Verlet velocity algorithm [10] is usually used to solve Newton's equation of motion, the solution process is as follows: (1) The position coordinate, velocity and direction of the bead at

the next moment are determined by the current position coordinate, speed and direction of the bead and the force applied; (2) the force of the bead at the next moment is calculated according to the current position coordinate, speed and direction, and then the speed is corrected to complete a cycle. The formulas used in the process are given as follows from equations (9) to (12).

$$r_i(t + \delta t) = r_i(t) + \delta t v_i(t) + \frac{1}{2} (\delta t)^2 f_i(t) \quad (9)$$

$$\tilde{v}_i(t + \delta t) = v_i(t) + \lambda \delta t f_i(t) \quad (10)$$

$$f_i(t + \delta t) = f_i[r(t + \delta t), \tilde{v}(t + \delta t)] \quad (11)$$

$$v_i(t + \delta t) = v_i(t) + \frac{1}{2} \delta t [f_i(t) + f_i(t + \delta t)] \quad (12)$$

### 4.3. The Calculation Process of DPD Simulation

The general calculation process of DPD is shown in **Fig. S5**. The main steps are as follows:

- (1) Setting the initial conditions, including the total number of beads in the system, system temperature, system density, operation steps and time.
- (2) Newton's equation of motion was solved by computer.
- (3) The average temperature, potential energy and total energy of the system were calculated.

In the process of DPD simulation, the most important thing is to accurately obtain the repulsion force between beads, which plays the decisive role in the accuracy of the final dynamic calculation results. After the calculation and analysis of the forces all beads in the system, the Material Studio software will solve Newton's equation of beads to get the position coordinates, speed and direction of beads at a specific time. It will further calculate the temperature, energy and pressure of the system to keep the system at constant temperature and constant pressure, and finally through the cycle until the initial set calculation time is completed.

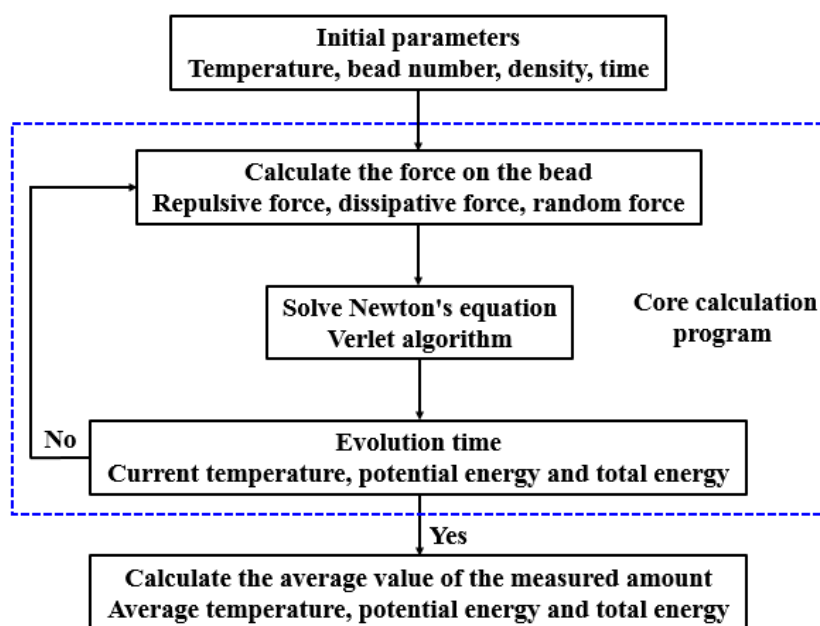

Figure S5. DPD calculation process.

Table S1. The atomic clusters represented by each bead and repulsive force parameters between the beads.

| Atomic clusters                                 | Beads | A0 | A1  | A2  | A3  | A4  | A5 | S1 | S2 | S3 | S4 | S5 | S6 | S7 | S8 | S9 | P1 | P2 | P3 | P4 | P5 | P6 | P7 | P8  | P9 | P10 | P11 | P12 | P13 | P14 | P15 | T1 | T2  | W   |
|-------------------------------------------------|-------|----|-----|-----|-----|-----|----|----|----|----|----|----|----|----|----|----|----|----|----|----|----|----|----|-----|----|-----|-----|-----|-----|-----|-----|----|-----|-----|
| C <sub>14</sub> H <sub>14</sub> NOS             | A0    | 25 | 82  | 35  | 31  | 69  | 26 | 57 | 39 | 60 | 44 | 59 | 36 | 57 | 58 | 60 | 30 | 41 | 41 | 38 | 31 | 37 | 40 | 87  | 48 | 72  | 36  | 53  | 28  | 77  | 30  | 33 | 83  | 69  |
| C <sub>14</sub> H <sub>14</sub> S               | A1    | 82 | 25  | 56  | 50  | 40  | 96 | 82 | 73 | 80 | 51 | 79 | 70 | 75 | 72 | 80 | 63 | 76 | 82 | 86 | 74 | 73 | 87 | 104 | 86 | 93  | 92  | 80  | 72  | 101 | 73  | 70 | 103 | 118 |
| C <sub>14</sub> H <sub>13</sub> OS <sub>2</sub> | A2    | 35 | 56  | 25  | 39  | 51  | 43 | 82 | 61 | 81 | 57 | 81 | 69 | 75 | 76 | 82 | 58 | 66 | 68 | 37 | 61 | 66 | 68 | 69  | 31 | 91  | 60  | 76  | 58  | 97  | 58  | 48 | 101 | 88  |
| C <sub>14</sub> H <sub>13</sub> OS <sub>2</sub> | A3    | 31 | 50  | 39  | 25  | 53  | 29 | 76 | 57 | 82 | 62 | 82 | 58 | 76 | 78 | 82 | 57 | 72 | 70 | 36 | 62 | 65 | 70 | 78  | 39 | 91  | 69  | 79  | 58  | 97  | 58  | 50 | 102 | 98  |
| C <sub>14</sub> H <sub>14</sub> S               | A4    | 69 | 40  | 51  | 53  | 25  | 74 | 76 | 72 | 81 | 56 | 82 | 79 | 78 | 76 | 81 | 67 | 82 | 86 | 94 | 78 | 77 | 87 | 109 | 89 | 97  | 83  | 86  | 83  | 103 | 78  | 70 | 104 | 123 |
| C <sub>14</sub> H <sub>14</sub> NOS             | A5    | 26 | 96  | 43  | 29  | 74  | 25 | 56 | 39 | 62 | 43 | 61 | 49 | 65 | 56 | 61 | 33 | 39 | 40 | 48 | 32 | 43 | 41 | 87  | 36 | 69  | 35  | 55  | 29  | 76  | 30  | 35 | 80  | 79  |
| C <sub>8</sub> H <sub>14</sub>                  | S1    | 57 | 82  | 82  | 76  | 76  | 56 | 25 | 30 | 26 | 30 | 26 | 30 | 26 | 25 | 25 | 34 | 31 | 39 | 56 | 36 | 30 | 38 | 95  | 50 | 27  | 67  | 29  | 63  | 27  | 63  | 25 | 28  | 48  |
| C <sub>8</sub> H <sub>12</sub> O                | S2    | 39 | 73  | 61  | 57  | 72  | 39 | 30 | 25 | 30 | 35 | 30 | 26 | 30 | 30 | 30 | 26 | 27 | 25 | 38 | 26 | 28 | 27 | 46  | 36 | 30  | 36  | 26  | 33  | 32  | 33  | 30 | 33  | 37  |
| C <sub>8</sub> H <sub>12</sub>                  | S3    | 60 | 80  | 81  | 82  | 81  | 62 | 26 | 30 | 25 | 32 | 25 | 29 | 25 | 25 | 25 | 34 | 31 | 39 | 54 | 36 | 30 | 38 | 95  | 50 | 26  | 67  | 29  | 64  | 26  | 63  | 25 | 27  | 47  |
| C <sub>16</sub> H <sub>32</sub>                 | S4    | 44 | 51  | 57  | 62  | 56  | 43 | 30 | 35 | 32 | 25 | 32 | 35 | 30 | 30 | 32 | 36 | 35 | 45 | 58 | 40 | 34 | 43 | 98  | 57 | 38  | 70  | 38  | 64  | 39  | 63  | 28 | 42  | 60  |
| C <sub>8</sub> H <sub>12</sub>                  | S5    | 59 | 79  | 81  | 82  | 82  | 61 | 26 | 30 | 25 | 32 | 25 | 29 | 25 | 25 | 25 | 34 | 31 | 39 | 58 | 37 | 31 | 38 | 96  | 51 | 26  | 67  | 29  | 64  | 26  | 64  | 26 | 27  | 47  |
| C <sub>8</sub> H <sub>12</sub> O                | S6    | 36 | 70  | 69  | 58  | 79  | 49 | 30 | 26 | 29 | 35 | 29 | 25 | 30 | 30 | 29 | 27 | 25 | 28 | 38 | 26 | 26 | 28 | 49  | 35 | 30  | 36  | 27  | 36  | 31  | 35  | 27 | 33  | 36  |
| C <sub>8</sub> H <sub>14</sub>                  | S7    | 57 | 75  | 75  | 76  | 78  | 65 | 26 | 30 | 25 | 30 | 25 | 30 | 25 | 25 | 25 | 34 | 30 | 40 | 57 | 36 | 31 | 39 | 95  | 50 | 27  | 67  | 30  | 64  | 27  | 63  | 25 | 28  | 48  |
| C <sub>8</sub> H <sub>14</sub>                  | S8    | 58 | 72  | 76  | 78  | 76  | 56 | 25 | 30 | 25 | 30 | 25 | 30 | 25 | 25 | 25 | 34 | 31 | 40 | 54 | 36 | 30 | 39 | 94  | 51 | 27  | 67  | 30  | 63  | 28  | 62  | 25 | 29  | 48  |
| C <sub>8</sub> H <sub>12</sub>                  | S9    | 60 | 80  | 82  | 82  | 81  | 61 | 25 | 30 | 25 | 32 | 25 | 29 | 25 | 25 | 25 | 35 | 31 | 39 | 57 | 37 | 30 | 38 | 94  | 50 | 26  | 67  | 29  | 64  | 26  | 64  | 26 | 27  | 47  |
| C <sub>8</sub> H <sub>10</sub> O <sub>3</sub>   | P1    | 30 | 63  | 58  | 57  | 67  | 33 | 34 | 26 | 34 | 36 | 34 | 27 | 34 | 34 | 35 | 25 | 26 | 26 | 35 | 26 | 26 | 26 | 40  | 32 | 36  | 36  | 28  | 35  | 38  | 34  | 26 | 40  | 48  |
| C <sub>8</sub> H <sub>8</sub> O <sub>2</sub>    | P2    | 41 | 76  | 66  | 72  | 82  | 39 | 31 | 27 | 31 | 35 | 31 | 25 | 30 | 31 | 31 | 26 | 25 | 29 | 33 | 29 | 26 | 29 | 41  | 30 | 31  | 41  | 25  | 37  | 33  | 36  | 26 | 34  | 46  |
| C <sub>8</sub> H <sub>8</sub> O <sub>2</sub>    | P3    | 41 | 82  | 68  | 70  | 86  | 40 | 39 | 25 | 39 | 45 | 39 | 28 | 40 | 40 | 39 | 26 | 29 | 25 | 37 | 25 | 29 | 25 | 33  | 36 | 39  | 31  | 29  | 31  | 42  | 32  | 31 | 42  | 54  |
| C <sub>8</sub> H <sub>8</sub> O <sub>2</sub>    | P4    | 38 | 86  | 37  | 36  | 94  | 48 | 56 | 38 | 54 | 58 | 58 | 38 | 57 | 54 | 57 | 35 | 33 | 37 | 25 | 35 | 38 | 40 | 46  | 27 | 54  | 40  | 33  | 35  | 60  | 42  | 37 | 58  | 37  |
| C <sub>8</sub> H <sub>10</sub> O <sub>2</sub>   | P5    | 31 | 74  | 61  | 62  | 78  | 32 | 36 | 26 | 36 | 40 | 37 | 26 | 36 | 36 | 37 | 26 | 29 | 25 | 35 | 25 | 28 | 26 | 31  | 34 | 37  | 29  | 28  | 30  | 39  | 29  | 29 | 41  | 53  |
| C <sub>8</sub> H <sub>8</sub> O <sub>2</sub>    | P6    | 37 | 73  | 66  | 65  | 77  | 43 | 30 | 28 | 30 | 34 | 31 | 26 | 31 | 30 | 30 | 26 | 26 | 29 | 38 | 28 | 25 | 29 | 43  | 29 | 31  | 41  | 25  | 38  | 33  | 37  | 26 | 34  | 46  |
| C <sub>8</sub> H <sub>8</sub> O <sub>2</sub>    | P7    | 40 | 87  | 68  | 70  | 87  | 41 | 38 | 27 | 38 | 43 | 38 | 28 | 39 | 39 | 38 | 26 | 29 | 25 | 40 | 26 | 29 | 25 | 42  | 38 | 39  | 34  | 29  | 36  | 41  | 38  | 30 | 42  | 53  |
| C <sub>8</sub> H <sub>8</sub> O <sub>2</sub>    | P8    | 87 | 104 | 69  | 78  | 109 | 87 | 95 | 46 | 95 | 98 | 96 | 49 | 95 | 94 | 94 | 40 | 41 | 33 | 46 | 31 | 43 | 42 | 25  | 48 | 93  | 38  | 37  | 46  | 98  | 43  | 57 | 99  | 75  |
| C <sub>8</sub> H <sub>8</sub> O <sub>2</sub>    | P9    | 48 | 86  | 31  | 39  | 89  | 36 | 50 | 36 | 50 | 57 | 51 | 35 | 50 | 51 | 50 | 32 | 30 | 36 | 27 | 34 | 29 | 38 | 48  | 25 | 50  | 35  | 29  | 33  | 55  | 30  | 31 | 55  | 42  |
| C <sub>2</sub> H <sub>4</sub>                   | P10   | 72 | 93  | 91  | 91  | 97  | 69 | 27 | 30 | 26 | 38 | 26 | 30 | 27 | 27 | 26 | 36 | 31 | 39 | 54 | 37 | 31 | 39 | 93  | 50 | 25  | 66  | 28  | 64  | 25  | 63  | 28 | 25  | 45  |
| C <sub>3</sub> H <sub>7</sub> NO                | P11   | 36 | 92  | 60  | 69  | 83  | 35 | 67 | 36 | 67 | 70 | 67 | 36 | 67 | 67 | 67 | 36 | 41 | 31 | 40 | 29 | 41 | 34 | 38  | 35 | 66  | 25  | 39  | 27  | 70  | 26  | 36 | 71  | 66  |
| C <sub>3</sub> H <sub>7</sub> N                 | P12   | 53 | 80  | 76  | 79  | 86  | 55 | 29 | 26 | 29 | 38 | 29 | 38 | 27 | 30 | 29 | 28 | 25 | 29 | 33 | 28 | 25 | 29 | 37  | 29 | 28  | 39  | 25  | 38  | 29  | 40  | 26 | 30  | 40  |
| C <sub>3</sub> H <sub>8</sub> N <sub>2</sub> O  | P13   | 28 | 72  | 58  | 58  | 83  | 29 | 63 | 33 | 64 | 64 | 64 | 36 | 64 | 63 | 64 | 35 | 37 | 31 | 35 | 30 | 38 | 36 | 46  | 33 | 64  | 27  | 38  | 25  | 68  | 27  | 33 | 71  | 62  |
| C <sub>2</sub> H <sub>6</sub>                   | P14   | 77 | 101 | 97  | 97  | 103 | 76 | 27 | 32 | 26 | 39 | 26 | 31 | 27 | 28 | 26 | 38 | 33 | 42 | 60 | 39 | 33 | 41 | 98  | 55 | 25  | 70  | 29  | 68  | 25  | 67  | 28 | 25  | 46  |
| C <sub>3</sub> H <sub>8</sub> N <sub>2</sub> O  | P15   | 30 | 73  | 58  | 58  | 78  | 30 | 63 | 33 | 63 | 63 | 64 | 35 | 63 | 62 | 64 | 34 | 36 | 32 | 42 | 29 | 37 | 38 | 43  | 30 | 63  | 26  | 40  | 27  | 67  | 25  | 31 | 70  | 63  |
| C <sub>6</sub> H <sub>6</sub>                   | T1    | 33 | 70  | 48  | 50  | 70  | 35 | 25 | 30 | 25 | 28 | 26 | 27 | 25 | 25 | 26 | 26 | 26 | 31 | 37 | 29 | 26 | 30 | 57  | 31 | 28  | 36  | 26  | 33  | 28  | 31  | 25 | 30  | 45  |
| CH <sub>4</sub>                                 | T2    | 83 | 103 | 101 | 102 | 104 | 80 | 28 | 33 | 27 | 42 | 27 | 33 | 28 | 29 | 27 | 40 | 34 | 42 | 58 | 41 | 34 | 42 | 99  | 55 | 25  | 71  | 30  | 71  | 25  | 70  | 30 | 25  | 47  |
| H <sub>2</sub> O <sub>3</sub>                   | W     | 69 | 118 | 88  | 98  | 123 | 79 | 48 | 37 | 47 | 60 | 47 | 36 | 48 | 48 | 47 | 48 | 46 | 54 | 37 | 53 | 46 | 53 | 75  | 42 | 45  | 66  | 40  | 62  | 46  | 63  | 45 | 47  | 25  |



## References

1. Groot, R.; Warren, P. Dissipative particle dynamics: Bridging the gap between atomistic and mesoscopic simulation. *J. Chem. Phys.* **1997**, *107*, 4423–4435.
2. Aphinyan, S.; Geethalakshmi, K.; Yeo, J.; Shakouri, A.; Ng, T. Numerical characterization of ultraviolet ink fluid agglomeration and the surfactant effect in nanoinkjet printing. *Polym. Adv. Technol.* **2017**, *28*, 1057–1064.
3. Du, C.; Ji, Y.; Xue, J.; Hou, T.; Tang, J.; Lee, S.T.; Li, Y. Morphology and performance of polymer solar cell characterized by DPD simulation and graph theory. *Sci. Rep.* **2015**, *5*, 16854.
4. Pan, G.; Manke, C. Developments toward simulationS of entangled polymer melts by dissipative particle dynamics (DPD). *Int. J. Mod. Phys. B* **2003**, *17*, 231–235.
5. Espanol, P.; Warren, P. Statistical mechanics of dissipative particle dynamics. *Europhys. Lett.* **1995**, *30*, 191.
6. Fredrickson, G.; Liu, A.; Bates, F. Entropic corrections to the Flory-Huggins Theory of polymer blends: Architectural and conformational effects. *Macromolecules* **1994**, *27*, 2503–2511.
7. Bawendi, M.; Freed, K. Systematic corrections to Flory–Huggins theory: Polymer–solvent–void systems and binary blend–void systems. *J. Chem. Phys.* **1988**, *88*, 2741–2756.
8. Maiti, A.; Wescott, J.; Kung, P. Nanotube–polymer composites: Insights from Flory–Huggins theory and mesoscale simulations. *Mol. Simul.* **2005**, *31*, 143–149.
9. Zhao, Y.; Inbar, P.; Chokshi, H.; Malick, A.; Choi, D. Prediction of the thermal phase diagram of amorphous solid dispersions by Flory–Huggins Theory. *J. Pharm. Sci.* **2011**, *100*, 3196–3207.
10. Laurent, A. Review of algorithms used in molecular dynamics simulations. *Undergrad. Res. Nat. Clin. Sci. Technol. (URNCSST) J.* **2019**, *3*, 1–11.
